# Supplementary material for: The Chemical Space of Terpenes: Insights from Data Science and AI
Source: MDPI journal article supplement (doi:10.3390/ph16020202), 2023-01-29
Supplement: s1 [file s1]

## Supplementary material

**Supplementary Table S1** - Features of the COCONUT database that were used and their description.

| Feature                              | Description                                                                                        |
|--------------------------------------|----------------------------------------------------------------------------------------------------|
| alogp (Ghose-Crippen LogKow)         | logP (Ghose-Crippen LogKow)                                                                        |
| alogp2                               | alogP squared                                                                                      |
| amralogp                             | AMR - molar refractivity                                                                           |
| apol                                 | Sum of the atomic polarizabilities                                                                 |
| bcutDescriptor                       | BCUT decriptor (Eigenvalue based)                                                                  |
| bpol                                 | BPol descriptor                                                                                    |
| cas                                  | CAS code                                                                                           |
| chemicalClass                        | Chemical class of the NP (computed with ClassyFire)                                                |
| chemicalSubClass                     | Chemical subclass of the NP (computed with ClassyFire)                                             |
| chemicalSuperClass                   | Chemical superclass of the NP (computed with ClassyFire)                                           |
| contains_ring_sugars                 | Boolean for the presence of circular sugars                                                        |
| contains_sugar                       | Boolean for the presence of linear sugars                                                          |
| directParentClassification           | Classification of parent molecule                                                                  |
| eccentricConnectivityIndexDescriptor | Eccentric Connectivity Index Descriptor                                                            |
| fmfDescriptor                        | fmf Descriptor                                                                                     |
| fragmentComplexityDescriptor         | Fragment Complexity Descriptor                                                                     |
| fsp3                                 | Fractional CSP3 Descriptor (non-flatness of a molecule)                                            |
| hBondAcceptorCount                   | Hydrogen bond acceptor count                                                                       |
| hBondDonorCount                      | Hydrogen bond donor count                                                                          |
| heavy_atom_number                    | Number of heavy atoms                                                                              |
| hybridizationRatioDescriptor         | Hybridization Ratio Descriptor (fraction of sp3 carbons to sp2 carbons)                            |
| iupac_name                           | IUPAC name                                                                                         |
| kappaShapeIndex1                     | First kappa shape index                                                                            |
| kappaShapeIndex2                     | Second kappa shape index                                                                           |
| kappaShapeIndex3                     | Third kappa shape index                                                                            |
| lipinskiRuleOf5Failures              | Number of Lipinski Rule of 5 violations                                                            |
| manholdlogp                          | LogP descriptor (Mannhold version)                                                                 |
| max_number_of_rings                  | Maximal number of rings                                                                            |
| min_number_of_rings                  | Minimal number of rings                                                                            |
| molecular_formula                    | Molecular formula                                                                                  |
| molecular_weight                     | Molecular weight                                                                                   |
| name                                 | Name of the molecule                                                                               |
| npl_noh_score                        | Natural product-likeness score without taking into account any hydrogen in the molecular structure |
| npl_score                            | Natural product-likeness score                                                                     |
| npl_sugar_score                      | NP-likeness score computed on the glycosylated molecule                                            |
| number_of_carbons                    | Number of carbons                                                                                  |
| number_of_nitrogens                  | Number of nitrogens                                                                                |
| number_of_oxygens                    | Number of oxygens                                                                                  |
| numberSpiroAtoms                     | Number of spiro atoms                                                                              |
| directParentClassification           | Direct parent in the chemical ontology (computed with Classyfire)                                  |
| petitjeanNumber                      | Petitjean Number                                                                                   |
| petitjeanShapeTopo                   | Petitjean geometrical shape index                                                                  |
| smiles                               | SMILES notation                                                                                    |
| sugar_free_heavy_atom_number         | Number of heavy atoms of the deglycosylated moiety                                                 |
| sugar_free_smiles                    | SMILES of the deglycosylated moiety                                                                |

---

|                              |                                                 |
|------------------------------|-------------------------------------------------|
| sugar_free_total_atom_number | Total atom number of the deglycosylated moiety  |
| textTaxa                     | List of organisms producing the NP in text form |
| topoPSA                      | Topological polar surface area descriptor       |
| total_atom_number            | Total atom number                               |
| tpsaEfficiency               | Fractional polar surface area descriptor        |
| vertexAdjMagnitude           | Vertex adjacency information                    |
| weinerPathNumber             | Wiener Path Number                              |
| weinerPolarityNumber         | Wiener Polarity Number                          |

---

Supplementary Table S2 - Distribution of Lipids and lipid-like molecules.

| <b>Class</b>                          | <b>Count</b> | <b>Out of total</b> |
|---------------------------------------|--------------|---------------------|
| Triterpenoids                         | 13,245       | 13.411%             |
| Diterpenoids                          | 11,814       | 11.962%             |
| Sesquiterpenoids                      | 10,815       | 10.950%             |
| Terpene lactones                      | 9580         | 9.700%              |
| Terpene glycosides                    | 7727         | 7.824%              |
| Monoterpenoids                        | 5115         | 5.179%              |
| Steroidal glycosides                  | 4541         | 4.598%              |
| Fatty acids and conjugates            | 3177         | 3.217%              |
| Fatty alcohols                        | 2848         | 2.884%              |
| Steroid lactones                      | 2641         | 2.674%              |
| Fatty acid esters                     | 2182         | 2.209%              |
| Fatty acyl glycosides                 | 1380         | 1.397%              |
| Sesterterpenoids                      | 1326         | 1.343%              |
| Pregnane steroids                     | 1301         | 1.317%              |
| Bile acids, alcohols and derivatives  | 1283         | 1.299%              |
| Glycerophosphocholines                | 1243         | 1.259%              |
| Glycerophosphoethanolamines           | 1161         | 1.176%              |
| Steroid esters                        | 1099         | 1.113%              |
| Androstane steroids                   | 882          | 0.893%              |
| Oxosteroids                           | 881          | 0.892%              |
| Ergostane steroids                    | 853          | 0.864%              |
| Diradylglycerols                      | 822          | 0.832%              |
| Hydroxysteroids                       | 818          | 0.828%              |
| Cholestane steroids                   | 789          | 0.799%              |
| Eicosanoids                           | 785          | 0.795%              |
| Stigmastanes and derivatives          | 736          | 0.745%              |
| Glycosphingolipids                    | 712          | 0.721%              |
| Quinone and hydroquinone lipids       | 711          | 0.720%              |
| Fatty alcohol esters                  | 710          | 0.719%              |
| Tetraterpenoids                       | 676          | 0.684%              |
| Cycloartanols and derivatives         | 643          | 0.651%              |
| Fatty amides                          | 527          | 0.534%              |
| Lineolic acids and derivatives        | 494          | 0.500%              |
| Glycerophosphoinositols               | 445          | 0.451%              |
| Triradylglycerols                     | 440          | 0.446%              |
| Steroidal alkaloids                   | 381          | 0.386%              |
| Fatty acyl thioesters                 | 280          | 0.284%              |
| Estrane steroids                      | 264          | 0.267%              |
| Hopanoids                             | 244          | 0.247%              |
| Glycosylglycerols                     | 243          | 0.246%              |
| Glycerophosphoinositol phosphates     | 237          | 0.240%              |
| Ecdysteroids                          | 228          | 0.231%              |
| Cucurbitacins                         | 212          | 0.215%              |
| Ceramides                             | 179          | 0.181%              |
| Sesquaterpenoids                      | 163          | 0.165%              |
| Fatty aldehydes                       | 157          | 0.159%              |
| Monoradylglycerols                    | 132          | 0.134%              |
| Glycerophosphoglycerols               | 130          | 0.132%              |
| Glycerophosphoserines                 | 116          | 0.117%              |
| Phosphosphingolipids                  | 107          | 0.108%              |
| Glycerophosphoglycerophosphates       | 106          | 0.107%              |
| Glycerophosphoglycerophosphoglycerols | 101          | 0.102%              |

|                                    |    |        |
|------------------------------------|----|--------|
| Gorgostanes and derivatives        | 99 | 0.100% |
| Vitamin D and derivatives          | 93 | 0.094% |
| Polyprenols                        | 91 | 0.092% |
| Steroid acids                      | 86 | 0.087% |
| Azasteroids and derivatives        | 84 | 0.085% |
| Retinoids                          | 76 | 0.077% |
| Acyltrehaloses                     | 58 | 0.059% |
| Polyterpenoids                     | 48 | 0.049% |
| Delta-7-steroids                   | 41 | 0.042% |
| Furostanes and derivatives         | 40 | 0.041% |
| CDP-glycerols                      | 40 | 0.041% |
| Glycerophosphates                  | 40 | 0.041% |
| Furospirostanes and derivatives    | 37 | 0.037% |
| Physalins and derivatives          | 35 | 0.035% |
| Oxasteroids and derivatives        | 33 | 0.033% |
| Sulfated steroids                  | 32 | 0.032% |
| Delta-5-steroids                   | 27 | 0.027% |
| 17-furanylsteroids and derivatives | 25 | 0.025% |
| Polyprenylphenols                  | 22 | 0.022% |
| Glycerol vinyl ethers              | 19 | 0.019% |
| 5,6-epoxysteroids                  | 17 | 0.017% |
| Glycerol ethers                    | 11 | 0.011% |
| Isoprenoid phosphates              | 11 | 0.011% |
| C24-propyl sterols and derivatives | 6  | 0.006% |
| Halogenated steroids               | 3  | 0.003% |
| Delta-1,4-steroids                 | 2  | 0.002% |
| Glycerophosphonocholines           | 2  | 0.002% |
| Lysobisphosphatidic acids          | 1  | 0.001% |
| Semilysobisphosphatidic acids      | 1  | 0.001% |
| Glycerophosphonoethanolamines      | 1  | 0.001% |
| Glycero-3-pyrophosphates           | 1  | 0.001% |
| Phosphonosphingolipids             | 1  | 0.001% |

**Supplementary Table S3** - Parameters of clustering and dimensionality reduction methods run in the experiments.

| Method                          | Parameters                                                                                                             |
|---------------------------------|------------------------------------------------------------------------------------------------------------------------|
| <b>Clustering</b>               |                                                                                                                        |
| <i>k</i> -means                 | n_clusters=9, n_init=4                                                                                                 |
| Agglomerative                   | n_clusters=9, linkage='ward'                                                                                           |
| <b>Dimensionality reduction</b> |                                                                                                                        |
| PCA0                            | n_components=0.9 (automatically choose the number of components that preserve 90% of variance. In our case, it is 11.) |
| PCA1                            | n_components=2                                                                                                         |
| UMAP0                           | n_neighbors=5, min_dist=0.01                                                                                           |
| UMAP1                           | n_neighbors=5, min_dist=0.1                                                                                            |
| UMAP2                           | n_neighbors=5, min_dist=0.4                                                                                            |
| UMAP3                           | n_neighbors=13, min_dist=0.01                                                                                          |
| UMAP4                           | n_neighbors=13, min_dist=0.1                                                                                           |
| UMAP5                           | n_neighbors=13, min_dist=0.4                                                                                           |
| UMAP6                           | n_neighbors=45, min_dist=0.01                                                                                          |
| UMAP7                           | n_neighbors=45, min_dist=0.1                                                                                           |
| UMAP8                           | n_neighbors=45, min_dist=0.4                                                                                           |
| TSNE0                           | perplexity=5, n_iter=300                                                                                               |
| TSNE1                           | perplexity=5, n_iter=900                                                                                               |
| TSNE2                           | perplexity=5, n_iter=1300                                                                                              |
| TSNE3                           | perplexity=20, n_iter=300                                                                                              |
| TSNE4                           | perplexity=20, n_iter=900                                                                                              |
| TSNE5                           | perplexity=20, n_iter=1300                                                                                             |
| TSNE6                           | perplexity=50, n_iter=300                                                                                              |
| TSNE7                           | perplexity=50, n_iter=900                                                                                              |
| TSNE8                           | perplexity=50, n_iter=1300                                                                                             |
| FastICA                         | tol=0.1                                                                                                                |
| Kernel PCA                      | kernel='cosine'                                                                                                        |

**Supplementary Table S4** - *k*-means clustering on the original data along with dimensionality reduced form of it, running on imbalanced and balanced data. Parameters are described in Supplementary Table S3.

| Dim reduce             | Time (s) | Homo | Compl | V-meas | ARI  | AMI  | Silhouette |
|------------------------|----------|------|-------|--------|------|------|------------|
| <b>Imbalanced data</b> |          |      |       |        |      |      |            |
| original               | 0*       | 0.30 | 0.32  | 0.31   | 0.23 | 0.31 | 0.19       |
| PCA0                   | 0*       | 0.32 | 0.33  | 0.33   | 0.25 | 0.33 | 0.21       |
| PCA1                   | 0*       | 0.27 | 0.28  | 0.28   | 0.19 | 0.28 | 0.39       |
| UMAP0                  | 14       | 0.01 | 0.01  | 0.01   | 0.01 | 0.01 | 0.37       |
| UMAP1                  | 10       | 0.01 | 0.01  | 0.01   | 0.01 | 0.01 | 0.34       |
| UMAP2                  | 10       | 0.04 | 0.03  | 0.03   | 0.03 | 0.03 | 0.36       |
| UMAP3                  | 13       | 0.01 | 0.01  | 0.01   | 0.01 | 0.01 | 0.35       |
| UMAP4                  | 13       | 0.05 | 0.04  | 0.04   | 0.03 | 0.04 | 0.35       |
| UMAP5                  | 12       | 0.12 | 0.11  | 0.11   | 0.10 | 0.11 | 0.37       |
| UMAP6                  | 19       | 0.35 | 0.36  | 0.36   | 0.29 | 0.35 | 0.46       |
| UMAP7                  | 19       | 0.39 | 0.40  | 0.40   | 0.32 | 0.40 | 0.42       |
| UMAP8                  | 19       | 0.38 | 0.39  | 0.38   | 0.31 | 0.38 | 0.38       |
| TSNE0                  | 36       | 0.01 | 0.01  | 0.01   | 0.01 | 0.01 | 0.37       |
| TSNE1                  | 69       | 0.01 | 0.01  | 0.01   | 0.01 | 0.01 | 0.36       |
| TSNE2                  | 96       | 0.02 | 0.02  | 0.02   | 0.02 | 0.01 | 0.38       |
| TSNE3                  | 39       | 0.08 | 0.07  | 0.08   | 0.07 | 0.07 | 0.38       |
| TSNE4                  | 76       | 0.07 | 0.06  | 0.06   | 0.06 | 0.06 | 0.35       |
| TSNE5                  | 100      | 0.07 | 0.07  | 0.07   | 0.04 | 0.06 | 0.37       |
| TSNE6                  | 45       | 0.21 | 0.20  | 0.21   | 0.19 | 0.21 | 0.39       |
| TSNE7                  | 89       | 0.20 | 0.19  | 0.19   | 0.18 | 0.19 | 0.39       |
| TSNE8                  | 115      | 0.20 | 0.19  | 0.19   | 0.18 | 0.19 | 0.38       |
| FastICA                | 0*       | 0.23 | 0.25  | 0.24   | 0.16 | 0.24 | 0.46       |
| Kernel PCA             | 72       | 0.24 | 0.23  | 0.23   | 0.20 | 0.23 | 0.50       |
| <b>Balanced data</b>   |          |      |       |        |      |      |            |
| original               | 0*       | 0.27 | 0.31  | 0.29   | 0.25 | 0.29 | 0.21       |
| PCA0                   | 0*       | 0.27 | 0.31  | 0.29   | 0.25 | 0.29 | 0.24       |
| PCA1                   | 0*       | 0.27 | 0.30  | 0.29   | 0.24 | 0.29 | 0.40       |
| UMAP0                  | 100      | 0.02 | 0.02  | 0.02   | 0.02 | 0.02 | 0.33       |
| UMAP1                  | 103      | 0.02 | 0.02  | 0.02   | 0.02 | 0.02 | 0.33       |
| UMAP2                  | 105      | 0.02 | 0.02  | 0.02   | 0.02 | 0.02 | 0.34       |
| UMAP3                  | 22       | 0.02 | 0.02  | 0.02   | 0.02 | 0.02 | 0.32       |
| UMAP4                  | 22       | 0.06 | 0.06  | 0.06   | 0.07 | 0.06 | 0.33       |
| UMAP5                  | 22       | 0.01 | 0.01  | 0.01   | 0.01 | 0.01 | 0.34       |
| UMAP6                  | 26       | 0.07 | 0.08  | 0.07   | 0.09 | 0.07 | 0.37       |
| UMAP7                  | 26       | 0.11 | 0.11  | 0.11   | 0.12 | 0.11 | 0.36       |
| UMAP8                  | 26       | 0.02 | 0.02  | 0.02   | 0.02 | 0.02 | 0.35       |
| TSNE0                  | 56       | 0.01 | 0.01  | 0.01   | 0.01 | 0.01 | 0.36       |
| TSNE1                  | 109      | 0.02 | 0.02  | 0.02   | 0.02 | 0.02 | 0.36       |
| TSNE2                  | 141      | 0.01 | 0.01  | 0.01   | 0.02 | 0.01 | 0.36       |
| TSNE3                  | 61       | 0.15 | 0.15  | 0.15   | 0.16 | 0.15 | 0.37       |
| TSNE4                  | 111      | 0.09 | 0.09  | 0.09   | 0.09 | 0.09 | 0.36       |

|            |      |      |      |      |      |      |      |
|------------|------|------|------|------|------|------|------|
| TSNE5      | 142  | 0.14 | 0.14 | 0.14 | 0.15 | 0.14 | 0.36 |
| TSNE6      | 65   | 0.24 | 0.24 | 0.24 | 0.24 | 0.24 | 0.38 |
| TSNE7      | 123  | 0.19 | 0.19 | 0.19 | 0.20 | 0.19 | 0.37 |
| TSNE8      | 170  | 0.21 | 0.21 | 0.21 | 0.21 | 0.21 | 0.37 |
| FastICA    | 0*   | 0.19 | 0.22 | 0.20 | 0.13 | 0.20 | 0.47 |
| Kernel PCA | 1353 | 0.25 | 0.25 | 0.25 | 0.24 | 0.25 | 0.45 |

\* Less than 1 second.

**Supplementary Table S5** - Agglomerative clustering on the original data and dimensionality reduced data, running on imbalanced and balanced data. Parameters are described in Supplementary Table S3.

| Dim reduce             | Time (s) | Homo | Compl | V-meas | ARI  | AMI  | Silhouette |
|------------------------|----------|------|-------|--------|------|------|------------|
| <b>Imbalanced data</b> |          |      |       |        |      |      |            |
| original               | 23       | 0.32 | 0.32  | 0.32   | 0.27 | 0.32 | 0.13       |
| PCA0                   | 16       | 0.32 | 0.32  | 0.32   | 0.28 | 0.32 | 0.16       |
| PCA1                   | 13       | 0.20 | 0.23  | 0.22   | 0.13 | 0.22 | 0.38       |
| UMAP0                  | 25       | 0.02 | 0.02  | 0.02   | 0.02 | 0.02 | 0.28       |
| UMAP1                  | 21       | 0.02 | 0.02  | 0.02   | 0.02 | 0.02 | 0.31       |
| UMAP2                  | 21       | 0.05 | 0.05  | 0.05   | 0.05 | 0.05 | 0.28       |
| UMAP3                  | 25       | 0.05 | 0.05  | 0.05   | 0.03 | 0.05 | 0.31       |
| UMAP4                  | 24       | 0.09 | 0.10  | 0.09   | 0.07 | 0.09 | 0.30       |
| UMAP5                  | 23       | 0.17 | 0.18  | 0.18   | 0.14 | 0.18 | 0.30       |
| UMAP6                  | 32       | 0.36 | 0.35  | 0.35   | 0.31 | 0.35 | 0.45       |
| UMAP7                  | 32       | 0.40 | 0.40  | 0.40   | 0.34 | 0.40 | 0.41       |
| UMAP8                  | 32       | 0.40 | 0.39  | 0.40   | 0.34 | 0.40 | 0.37       |
| TSNE0                  | 46       | 0.02 | 0.02  | 0.02   | 0.02 | 0.02 | 0.31       |
| TSNE1                  | 78       | 0.01 | 0.01  | 0.01   | 0.01 | 0.01 | 0.34       |
| TSNE2                  | 108      | 0.02 | 0.02  | 0.02   | 0.02 | 0.02 | 0.33       |
| TSNE3                  | 50       | 0.07 | 0.07  | 0.07   | 0.08 | 0.07 | 0.34       |
| TSNE4                  | 86       | 0.05 | 0.06  | 0.05   | 0.05 | 0.05 | 0.31       |
| TSNE5                  | 110      | 0.04 | 0.03  | 0.03   | 0.04 | 0.03 | 0.33       |
| TSNE6                  | 56       | 0.15 | 0.16  | 0.16   | 0.14 | 0.15 | 0.32       |
| TSNE7                  | 100      | 0.11 | 0.10  | 0.11   | 0.10 | 0.11 | 0.34       |
| TSNE8                  | 127      | 0.21 | 0.20  | 0.21   | 0.24 | 0.21 | 0.32       |
| FastICA                | 11       | 0.21 | 0.20  | 0.20   | 0.18 | 0.20 | 0.34       |
| Kernel PCA             | 83       | 0.17 | 0.17  | 0.17   | 0.13 | 0.17 | 0.40       |
| <b>Balanced data</b>   |          |      |       |        |      |      |            |
| original               | 56       | 0.15 | 0.17  | 0.16   | 0.11 | 0.16 | 0.21       |
| PCA0                   | 37       | 0.27 | 0.32  | 0.29   | 0.25 | 0.29 | 0.22       |
| PCA1                   | 24       | 0.18 | 0.22  | 0.20   | 0.13 | 0.20 | 0.40       |
| UMAP0                  | 122      | 0.02 | 0.02  | 0.02   | 0.02 | 0.02 | 0.29       |
| UMAP1                  | 132      | 0.02 | 0.02  | 0.02   | 0.02 | 0.02 | 0.31       |
| UMAP2                  | 127      | 0.02 | 0.02  | 0.02   | 0.02 | 0.02 | 0.28       |
| UMAP3                  | 54       | 0.01 | 0.01  | 0.01   | 0.01 | 0.01 | 0.29       |
| UMAP4                  | 46       | 0.04 | 0.04  | 0.04   | 0.04 | 0.04 | 0.28       |
| UMAP5                  | 45       | 0.02 | 0.02  | 0.02   | 0.01 | 0.02 | 0.29       |
| UMAP6                  | 55       | 0.05 | 0.05  | 0.05   | 0.05 | 0.05 | 0.32       |
| UMAP7                  | 51       | 0.10 | 0.11  | 0.10   | 0.10 | 0.10 | 0.34       |
| UMAP8                  | 49       | 0.05 | 0.05  | 0.05   | 0.05 | 0.05 | 0.29       |
| TSNE0                  | 80       | 0.04 | 0.04  | 0.04   | 0.04 | 0.04 | 0.33       |
| TSNE1                  | 133      | 0.02 | 0.02  | 0.02   | 0.02 | 0.02 | 0.32       |
| TSNE2                  | 161      | 0.01 | 0.01  | 0.01   | 0.01 | 0.01 | 0.33       |
| TSNE3                  | 84       | 0.12 | 0.12  | 0.12   | 0.09 | 0.12 | 0.33       |
| TSNE4                  | 132      | 0.17 | 0.19  | 0.18   | 0.15 | 0.18 | 0.29       |



|            |      |      |      |      |      |      |      |
|------------|------|------|------|------|------|------|------|
| TSNE5      | 165  | 0.09 | 0.09 | 0.09 | 0.07 | 0.09 | 0.28 |
| TSNE6      | 93   | 0.30 | 0.33 | 0.32 | 0.26 | 0.32 | 0.32 |
| TSNE7      | 144  | 0.13 | 0.13 | 0.13 | 0.14 | 0.13 | 0.34 |
| TSNE8      | 191  | 0.16 | 0.16 | 0.16 | 0.16 | 0.16 | 0.32 |
| FastICA    | 26   | 0.17 | 0.20 | 0.18 | 0.12 | 0.18 | 0.41 |
| Kernel PCA | 1381 | 0.28 | 0.30 | 0.29 | 0.28 | 0.29 | 0.40 |

**Supplementary Table S6** - Cross-validation of classification methods, without optimized hyperparameters, on the terpenes training data. Accuracy is “balanced” and the other metrics, except time, are “weighted”.

| Method        | Time (s) | Accuracy | F1   | Precision | Recall | ROC-AUC |
|---------------|----------|----------|------|-----------|--------|---------|
| LightGBM      | 16       | 0.90     | 0.90 | 0.90      | 0.90   | 0.99    |
| <i>k</i> NN   | 75       | 0.84     | 0.85 | 0.85      | 0.85   | 0.96    |
| Random forest | 87       | 0.89     | 0.91 | 0.91      | 0.91   | 0.99    |
| Gaussian NB   | 88       | 0.50     | 0.44 | 0.49      | 0.46   | 0.84    |
| MLP           | 184      | 0.85     | 0.86 | 0.86      | 0.86   | 0.98    |

**Supplementary Table S7** - Hyperparameter optimization of LightGBM and random forest running on the terpenes training data.

| Method        | Hyperparam        | Search space                         | Optimized hyperparam |
|---------------|-------------------|--------------------------------------|----------------------|
| LightGBM      | learning_rate     | 0.005, 0.01, 0.05, 0.1, 0.5, 0.75, 1 | 0.5                  |
|               | n_estimators      | 25, 50, 100, 150, 200                | 150                  |
|               | num_leaves        | 10, 15, 25, 31, 35                   | 31                   |
|               | boosting_type     | 'gbdt', 'dart', 'goss'               | 'dart'               |
|               | colsample_bytree  | 0.25, 0.5, 0.75, 1                   | 0.5                  |
|               | subsample         | 0.25, 0.5, 0.75, 1                   | 1                    |
|               | reg_alpha         | 0.25, 0.5, 1, 1.2                    | 1                    |
|               | reg_lambda        | 0.25, 0.5, 1, 1.2                    | 0.5                  |
| Random forest | bootstrap         | True, False                          | False                |
|               | max_depth         | 30, 60, 90, None                     | 90                   |
|               | min_samples_leaf  | 1, 2, 4                              | 1                    |
|               | min_samples_split | 2, 5, 10                             | 10                   |
|               | n_estimators      | 100, 500, 1000, 1500                 | 1000                 |

**Supplementary Table S8** - Cross-validation of LightGBM and random forest methods with optimized hyperparameters on the terpenes training data. Accuracy is “balanced” and the other metrics, except time, are “weighted”.

| Method        | Time (s) | Accuracy | F1   | Precision | Recall | ROC-AUC |
|---------------|----------|----------|------|-----------|--------|---------|
| LightGBM      | 34       | 0.91     | 0.92 | 0.92      | 0.92   | 0.99    |
| Random forest | 160      | 0.90     | 0.91 | 0.91      | 0.91   | 0.99    |
